# Supplementary material for: RANK/OPG ratio of expression in primary clear-cell renal cell carcinoma is associated with bone metastasis and prognosis in patients treated with anti-VEGFR-TKIs
Source: PubMed Central journal article supplement — Br J Cancer. 2015 Oct 13;113(9):1313–22. doi: 10.1038/bjc.2015.352 (PMC4815796; doi:10.1038/bjc.2015.352), 2015-10-13
Supplement: bjc2015352x1.pdf [file bjc2015352x1.pdf]

**SUPPLEMENTAL FIGURE 1: FLOWCHART WITH THE INCLUDED PATIENTS**

PANEL A: Patients included in the time-to-metastasis analysis

PANEL B: Patients included in the time-to-bone-metastasis analysis

PANEL C: Patients included in the analysis of efficacy of anti-VEGFR-TKIs

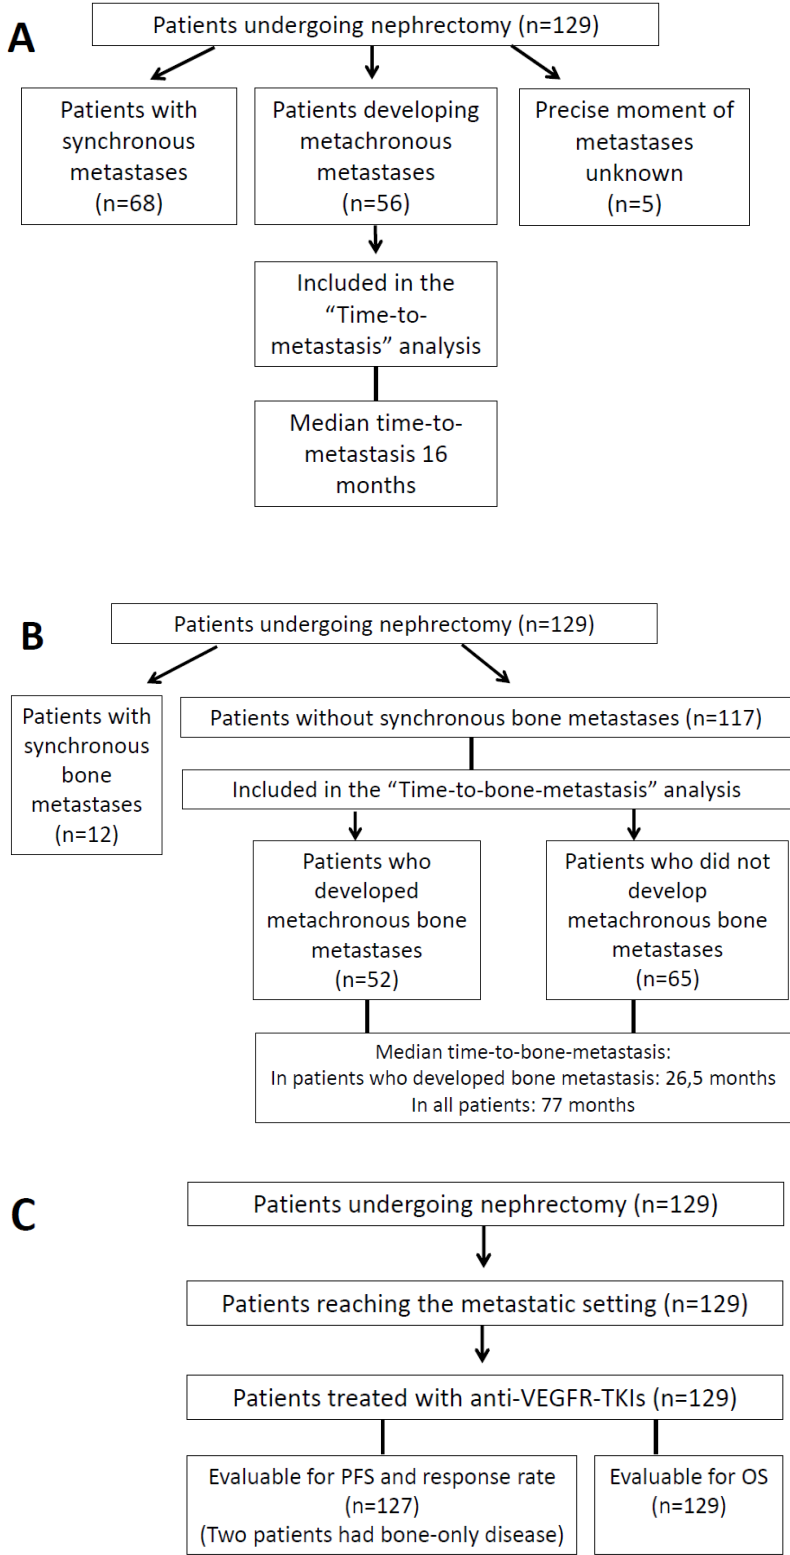

**SUPPLEMENTAL FIGURE 2: OPG, RANK AND SRC-EXPRESSION LEVELS IN TUMOR COMPARED TO NORMAL KIDNEY TISSUE.**

Expression levels, as defined by 2-delta-delta-CT ACTB, were compared by Mann-Whitney test. We observed higher RANK- ( $p=0.003$ ), lower SRC- ( $p=0.002$ ) and lower OPG-expression ( $p=0.003$ ) in tumors ( $n=129$ ) compared to normal kidney ( $n=9$ ).

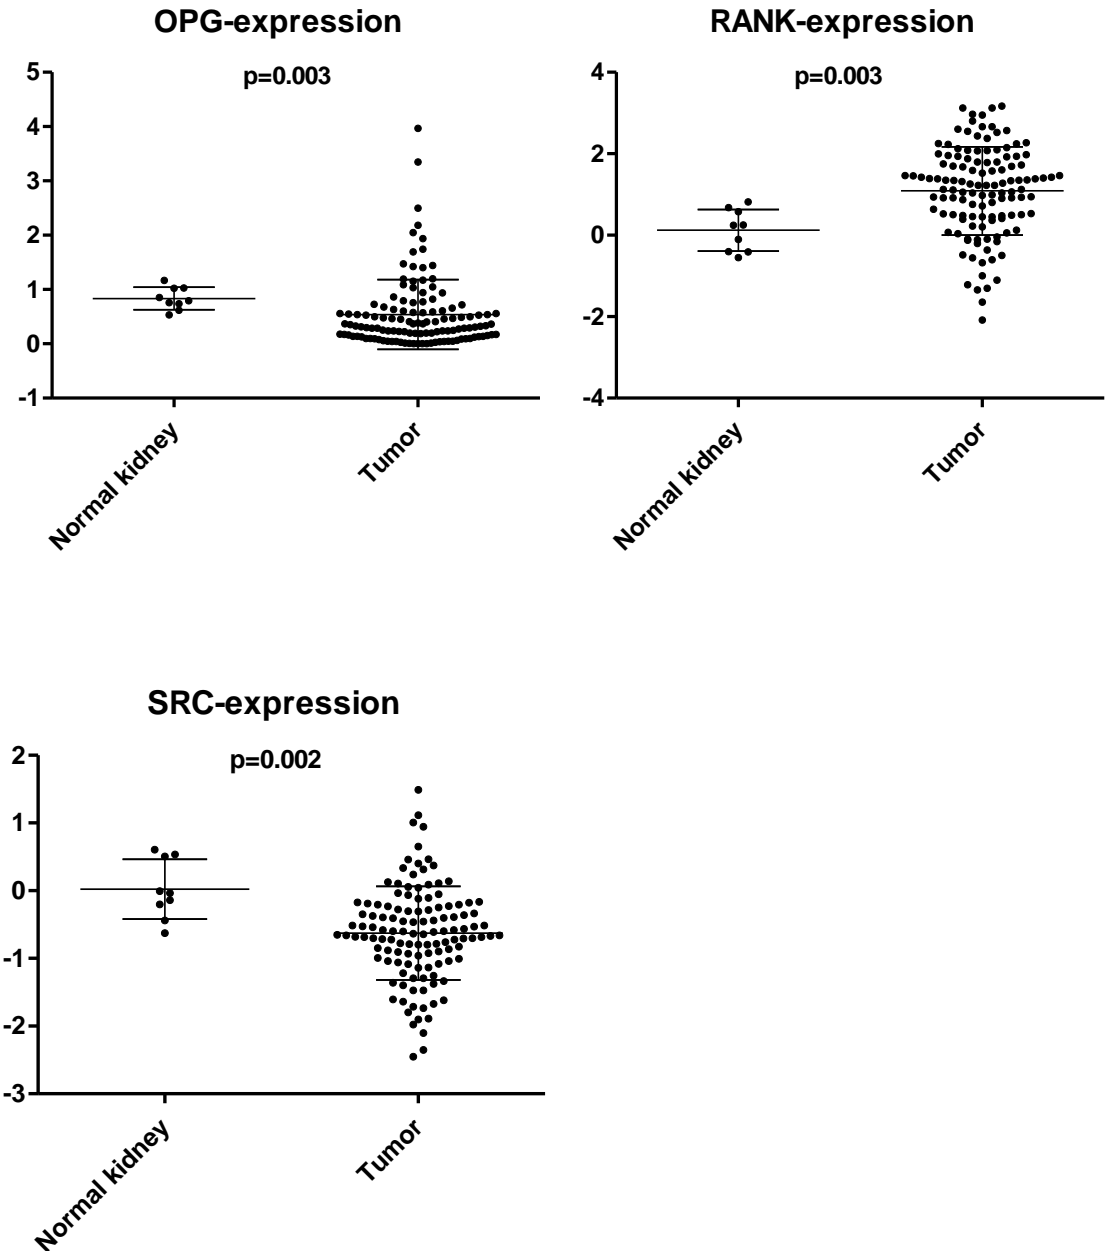

**SUPPLEMENTAL FIGURE 3: HISTOGRAM SHOWING THE GAUSSIAN DISTRIBUTION OF THE EXPRESSION LEVELS OF RANK, RANKL, OPG, SRC AND DKK1 IN THE PRIMARY KIDNEY TUMORS**

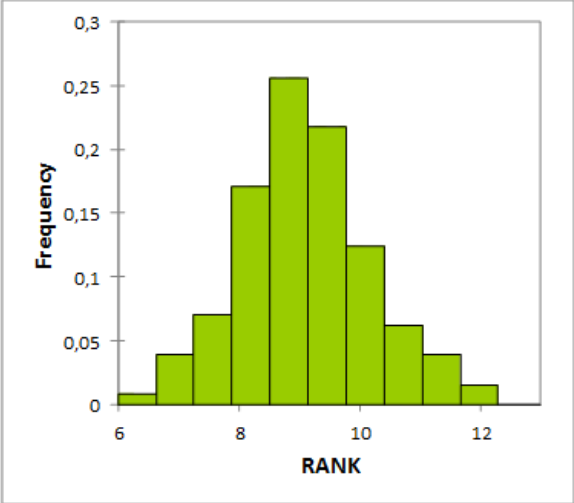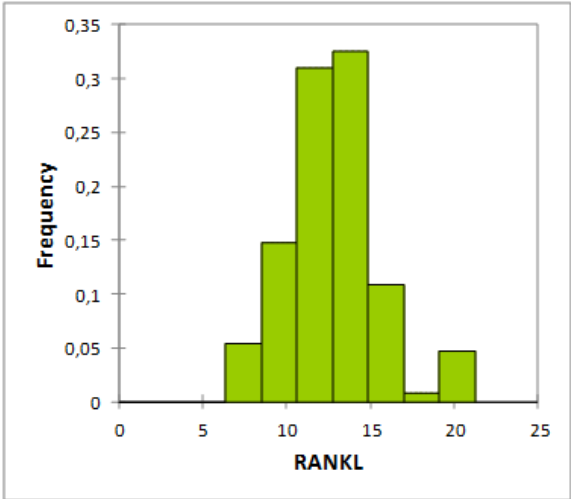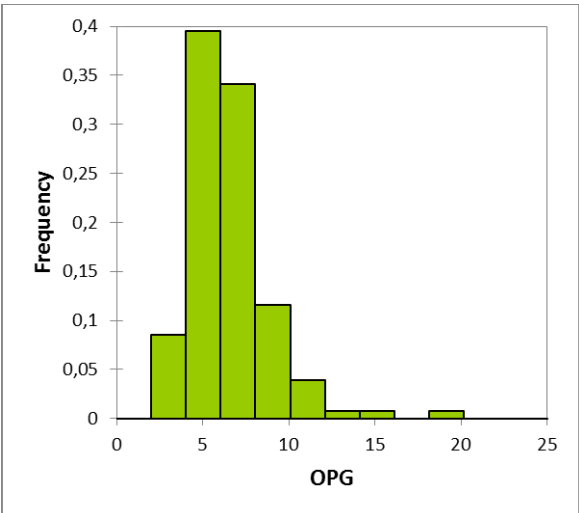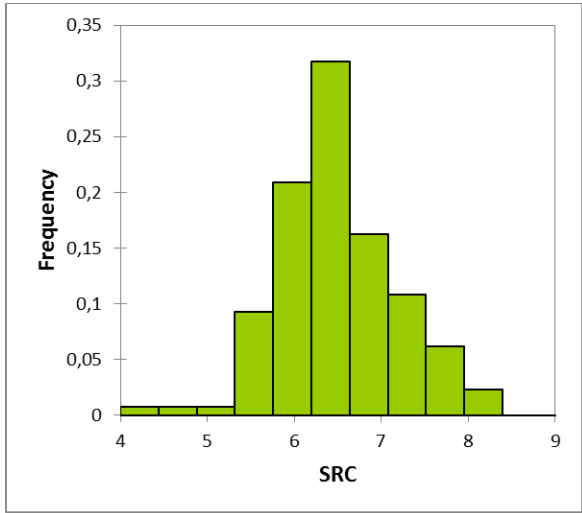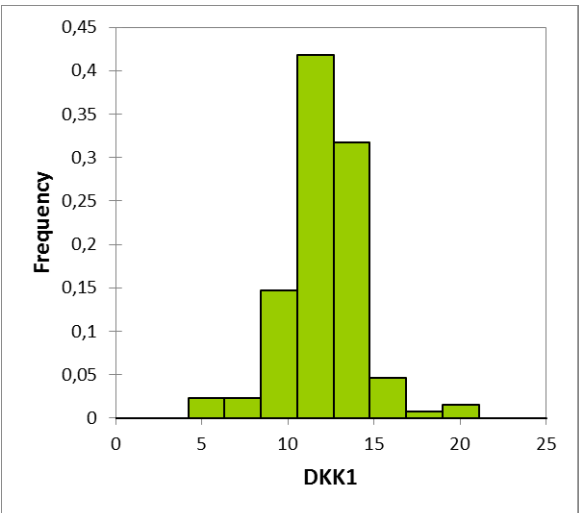

**SUPPLEMENTAL TABLE 1: GENE SYMBOL, GENE NAME AND APPLIED BIOSYSTEMS ASSAY ID-NUMBER FOR THE GENES STUDIED**

| Gene Symbol | Gene name                                  | Assay ID      |
|-------------|--------------------------------------------|---------------|
| ACTB        | Actine B                                   | Hs01060665_g1 |
| TNFSF11     | Receptor activator of NF-kB ligand         | Hs00243522_m1 |
| DKK1        | Dickkopf WNT signaling pathway inhibitor-1 | Hs00183740_m1 |
| TNFRSF11B   | Osteoprotegerin                            | Hs00900360_m1 |
| TNFRSF11A   | Receptor activator of NF-kB                | Hs00921374_m1 |
| SRC         | Src                                        | Hs01082246_m1 |

**SUPPLEMENTAL TABLE 2: PEARSON CORRELATION OF THE EXPRESSION LEVELS OF THE DIFFERENT GENES**

Among the total series of samples, the expression of the different genes was not correlated except for OPG- and SRC-expression, that were weakly correlated ( $r^2=0.138$ ,  $p<0.0001$ ).

| R <sup>2</sup> (p-value if <0.05) | RANK  | OPG              | RANKL | SRC   | DKK1 |
|-----------------------------------|-------|------------------|-------|-------|------|
| RANK                              | 1     |                  |       |       |      |
| OPG                               | 0.006 | 1                |       |       |      |
| RANKL                             | 0.000 | 0.036 (p=0.03)   | 1     |       |      |
| SRC                               | 0.005 | 0.138 (p<0.0001) | 0.003 | 1     |      |
| DKK1                              | 0.012 | 0.037 (p=0.03)   | 0.000 | 0.023 | 1    |
